# Supplementary material for: High catalytic activity and stability of visible-light-driven CO 2 reduction via CsPbBr 3 QDs/Cu-BTC core–shell photocatalysts
Source: Royal Society of Chemistry journal article supplement (doi:10.1039/d4ta07190e), 2025-01-01
Supplement: d4ta07190e1.pdf [file d4ta07190e1.pdf]

Supporting Information

**Highly Catalytic Activity and Stability of Visible-Light-Driven CO<sub>2</sub> Reduction via  
CsPbBr<sub>3</sub> QDs/Cu-BTC Core-Shell Photocatalysts**

Yuanming Hou<sup>1</sup>, Yanqing Zhang<sup>1</sup>, Shilong Jiao<sup>2,\*</sup>, Jingyi Qin<sup>1</sup>, Luoyu Liu<sup>1</sup>, Zhengzheng Xie<sup>1</sup>, Zhongjie Guan<sup>1</sup>, Jianjun Yang<sup>1</sup>, Qiuye Li<sup>1,\*</sup>, Xianwei Fu<sup>1,\*</sup>

<sup>1</sup> Engineering Research Center for Nanomaterials, National & Local Joint Engineering Research Center for Applied Technology of Hybrid Nanomaterials, Henan University, Kaifeng, 475004 Henan, P. R. China

<sup>2</sup> Key Lab for Special Functional Materials of Ministry of Education, Collaborative Innovation Center of Nano Functional Materials and Applications, Henan University, Kaifeng, 475004 Henan, P. R. China

Correspondence and requests for materials should be addressed X. F. (xwfu2021@henu.edu.cn), Q. L. (qiuyeli@henu.edu.cn), and sljiao@henu.edu.cn.

## 1. Chemicals and materials

Lead (II) bromide ( $\text{PbBr}_2$ , 99.0 %) was acquired from MACKLIN (Shanghai Macklin Biochemical Co., Ltd). Cesium carbonate ( $\text{Cs}_2\text{CO}_3$ , 99.9 % metals basis) and trimesic acid were obtained from MACKLIN (Shanghai Macklin Biochemical Co., Ltd). Copper (II) nitrate trihydrate ( $\text{Cu}(\text{NO}_3)_2 \cdot 3\text{H}_2\text{O}$ , AR) and oleic acid (OA) were purchased from Tianjin Kemiou Chemical Reagent Co., Ltd. Ethyl acetate and n-Hexane were purchased from FuYu Chemical Co., Ltd. 1-Octadecene (ODE) was obtained from MACKLIN (Shanghai Macklin Biochemical Technology Co., Ltd). Oleylamine (OAm) was obtained from Aladdin (Shanghai Aladdin Biochemical Technology Co., Ltd.).

## 2. Materials Characterization

Crystal structures of the synthesized samples were characterized by X-ray diffraction (XRD, X-ray powder diffractometer, D8-ADVANCE German Bruker). Scanning electron microscopy (SEM) images were measured by a Geminisem-500 Zeiss equipment. X-ray photoelectron spectroscopy (XPS) analysis was performed on a PHI-5000C ESCA photoelectron spectrometer with an Al  $K\alpha$  achromatic X-ray source. Transmission electron microscopy (TEM) and energy-dispersive X-ray (EDX) elemental mapping were measured by a TEM-2100 transmitted electron microscope. The photo-absorption properties were detected with a UV-vis spectrometer (UV-2600) in the presence of  $\text{BaSO}_4$  as the reference. The PL spectra were recorded by a Horiba LabRAM Odyssey with an excitation light source of 325 nm. Photocurrent density curves (i-t curves) and electrochemical impedance spectroscopy (EIS) were investigated on a CHI 600E electrochemical workstation (Shanghai Chenhua) with a three-electrode system, where Pt

foil, Hg/HgO, and fluorine-doped tin oxide (FTO) glass with catalyst films were employed as counter, reference, and the working electrode, respectively. The work electrode was fabricated by the following procedure: 2 mg of the photocatalysts were dispersed into the 1 mL cyclohexane solution to form a homogeneous suspension, which was then dip-dropped on an FTO glass with an exposure area of 1 cm<sup>2</sup>. Finally, the film was dried under a vacuum atmosphere at 60 °C. The acetonitrile containing 0.1 M tetrabutylammonium hexafluorophosphate (TBAPF<sub>6</sub>) was used as the electrolyte solution, and a 200 W Xe lamp was employed as the light source<sup>1</sup>.

### 3. Photocatalytic CO<sub>2</sub> reduction

Photocatalytic CO<sub>2</sub> reduction was carried out in a sealed quartz reactor. 10 mg of the photocatalyst, 28 ml of acetonitrile and 5 μL H<sub>2</sub>O were added to the reactor<sup>2</sup>. After sealing, the reactor was purged with high-purity CO<sub>2</sub> before the photocatalytic reaction. Subsequently, a 200 W Xe lamp with a UV-cut filter (420 nm) was used as the visible light source. During the CO<sub>2</sub> photoreduction, the gas products were analyzed by gas chromatography (GC-2018, Shimadzu, Japan) equipped with a flame ionization detector and thermal conductive detector. The H<sub>2</sub> obtained from H<sub>2</sub>O splitting was detected by the gas phase chromatograph (GC-2018C, Shimadzu) with the thermal conductivity detector.

The selectivity of products CO is assessed based on the following equation:

$$S_{CO} = \frac{2R_{CO}}{2R_{CO} + 8R_{CH_4}} \times 100\%$$

The total electron consumption rate is calculated as follows:

$$R_e = 2R_{CO} + 8R_{CH_4}$$

Where  $R_{CO}$  and  $R_{CH_4}$  represent the yield of CO and CH<sub>4</sub>. The coefficient in front of  $R$  represents the consumed electron number of multi-electron reactions.  $R_e$  represents the electron consumption rate.

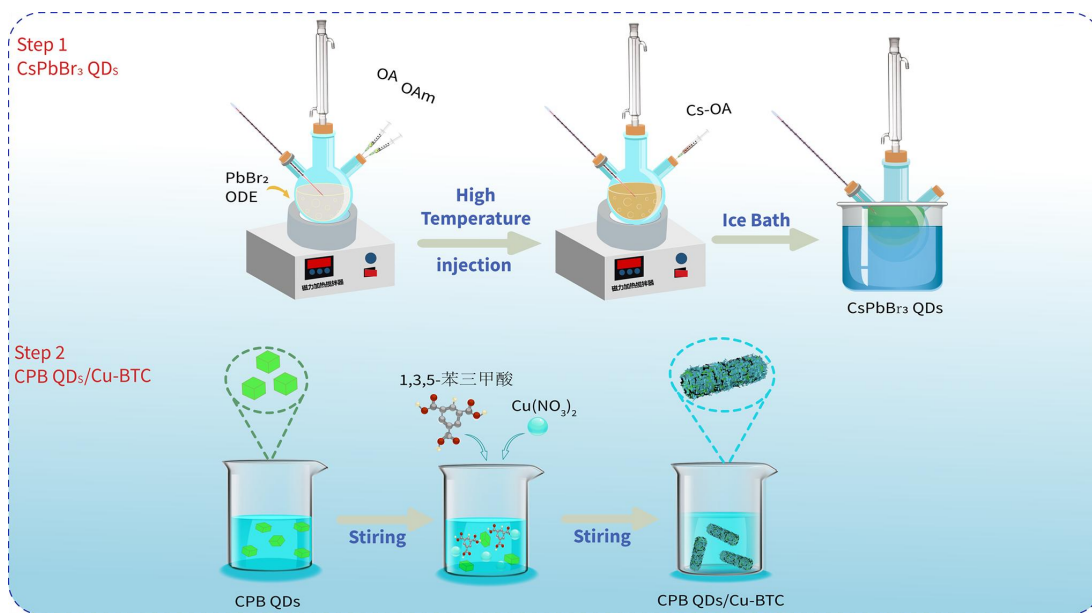

**Fig. S1.** Schematic diagram of the synthesis of CPB QDs and CPB QDs/ $Cu$ -BTC.

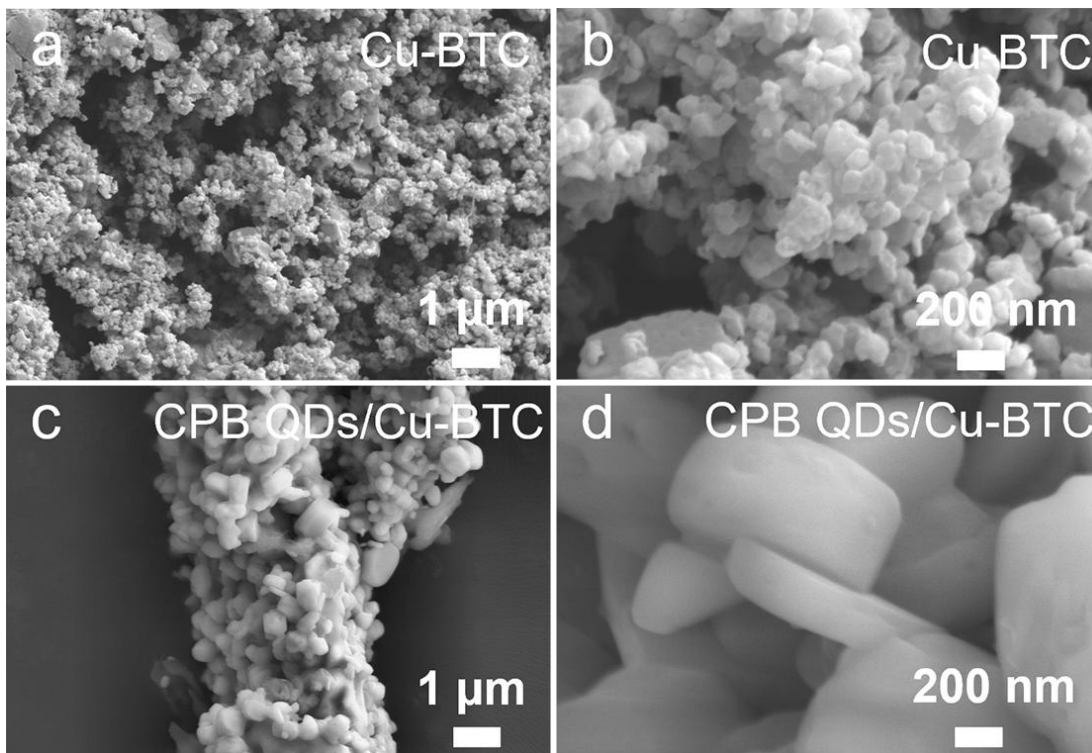

**Fig. S2.** SEM images of Cu-BTC (a-b) and CPB QDs/Cu-BTC hybrids (c-d).

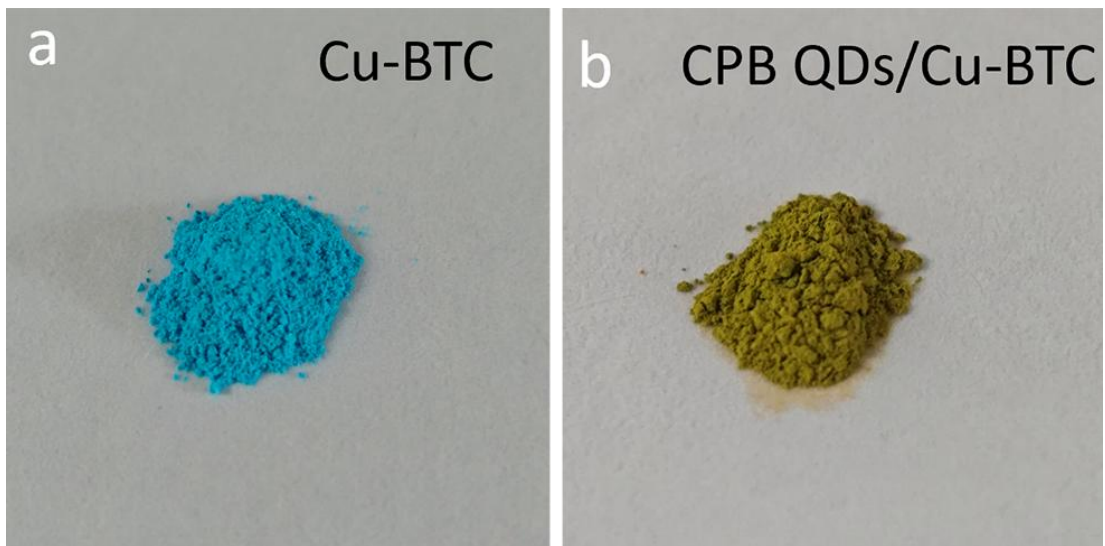

**Fig. S3.** Photographs of (a) Cu-BTC and (b) CPB QDs/Cu-BTC hybrids.

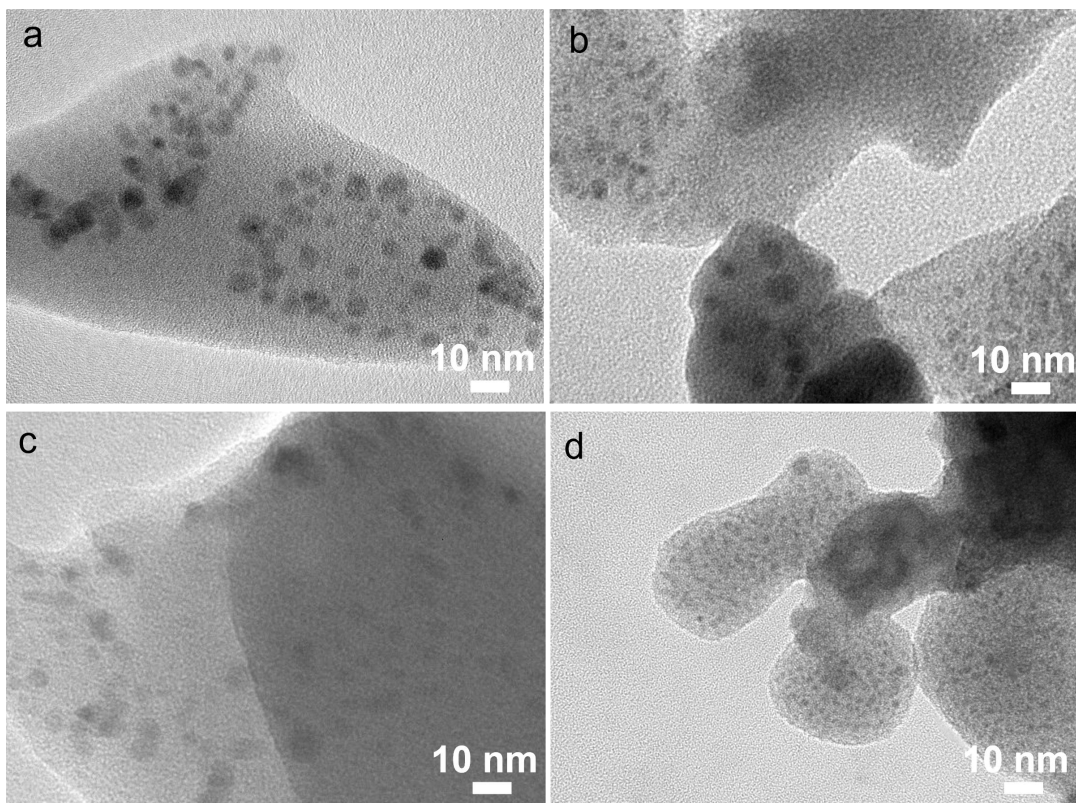

**Fig. S4. (a-d)** TEM images of the CPB QDs/Cu-BTC composites in different regions.



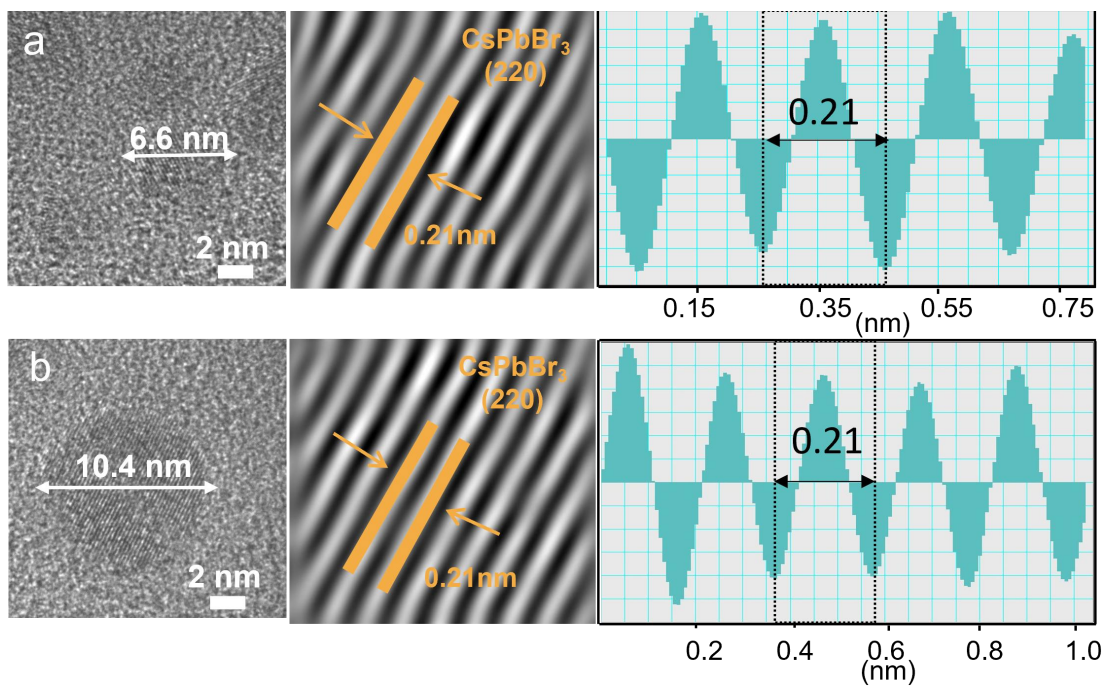

**Fig. S5.** High-resolution TEM (HRTEM) images of the CPB QDs (a-b).

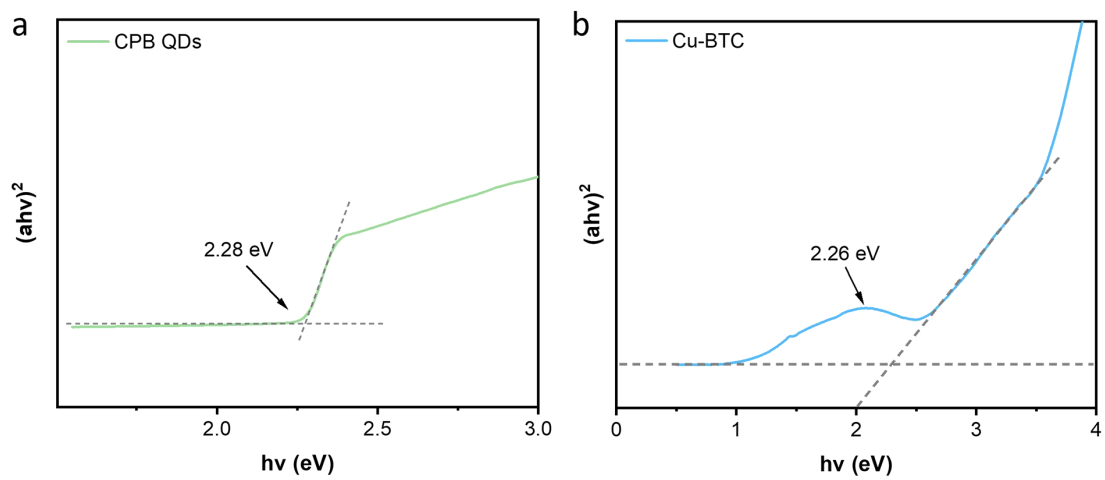

**Fig. S6.** Tauc plots of CPB QDs (a) and Cu-BTC (b).

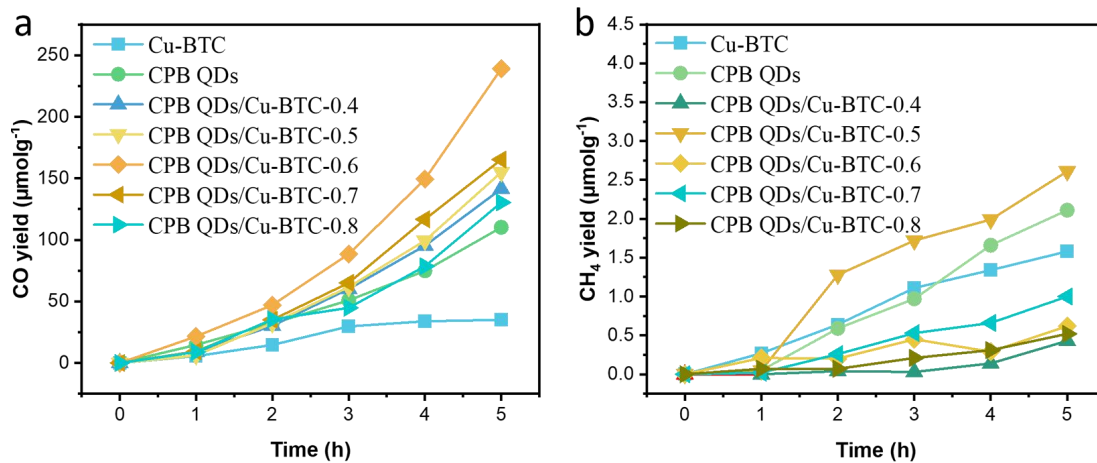

**Fig. S7.** The time-dependent production rate of CO (a) and CH<sub>4</sub> (b) over various catalysts.

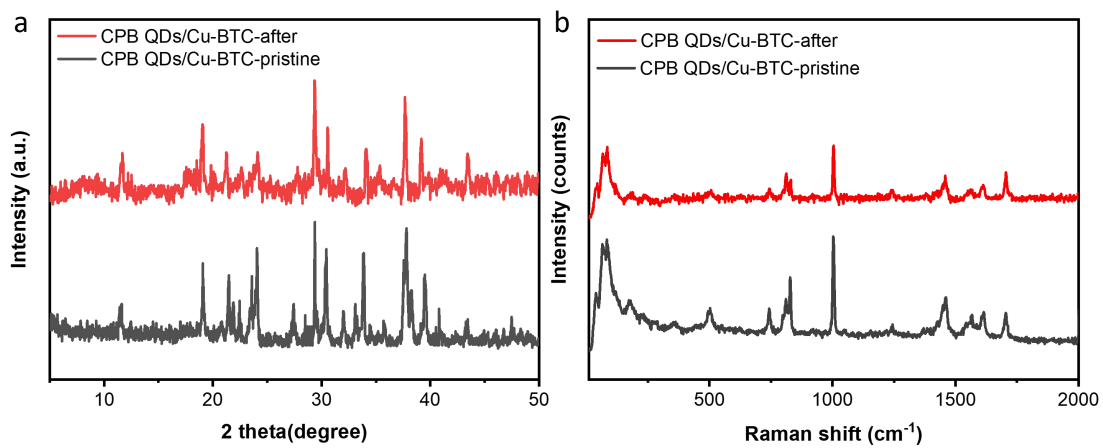

**Fig. S8.** The XRD (a) and Raman spectra (b) of the CPB QDs/Cu-BTC photocatalyst before and after reaction.

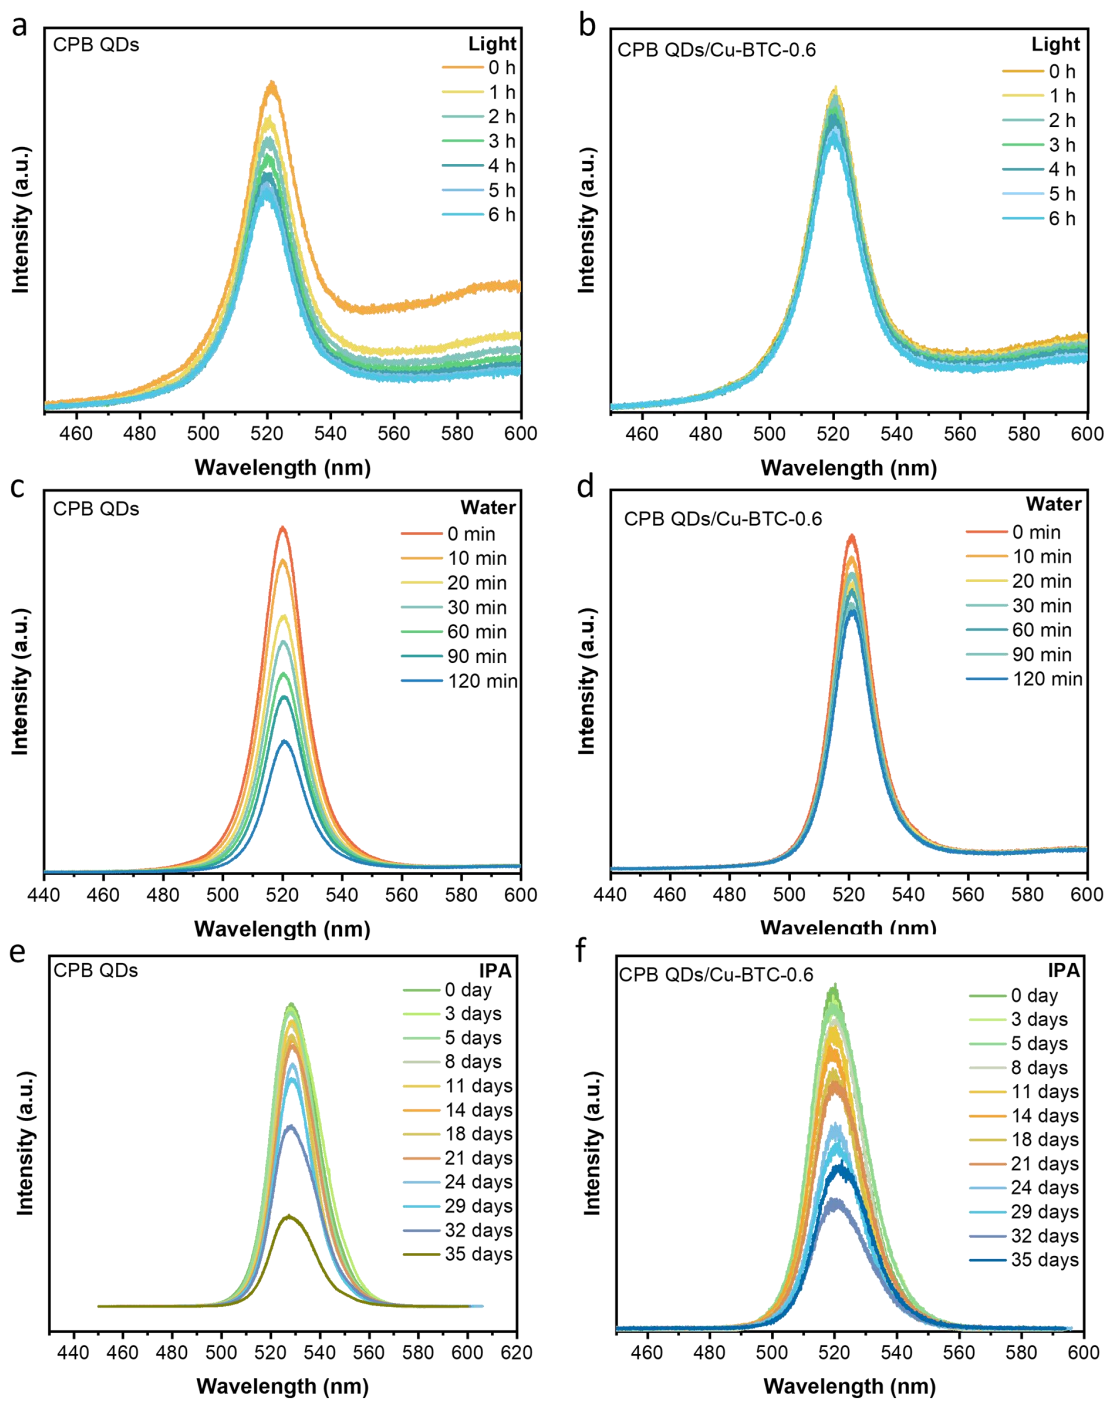

**Fig. S9.** PL spectra of pure CPB QDs and CPB QDs/ Cu-BTC-0.6 composites under different conditions. (a-b) Under 325 nm laser irradiation for 6 h. (c-d) In water. (e-f) In isopropanol (IPA).

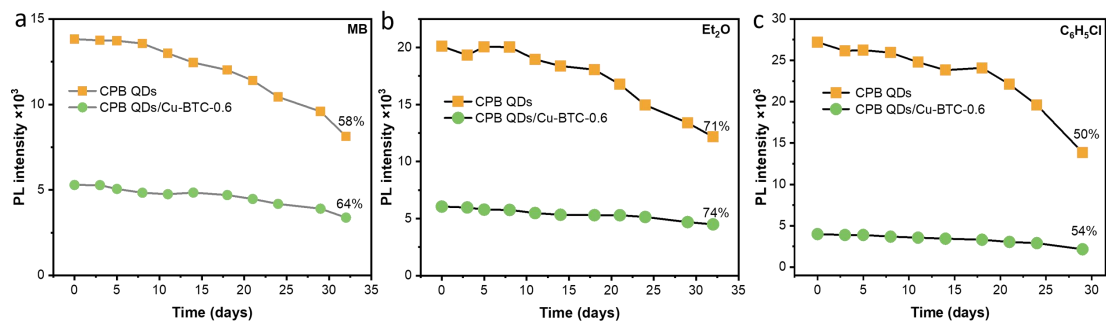

**Fig. S10.** (a) Time-dependent PL intensity of CPB QDs and CPB QDs/Cu-BTC composites in different solvents. (a) Methylbenzene (MB). (b) Ethyl alcohol (Et<sub>2</sub>O). (c) Chlorobenzene (C<sub>6</sub>H<sub>5</sub>Cl).

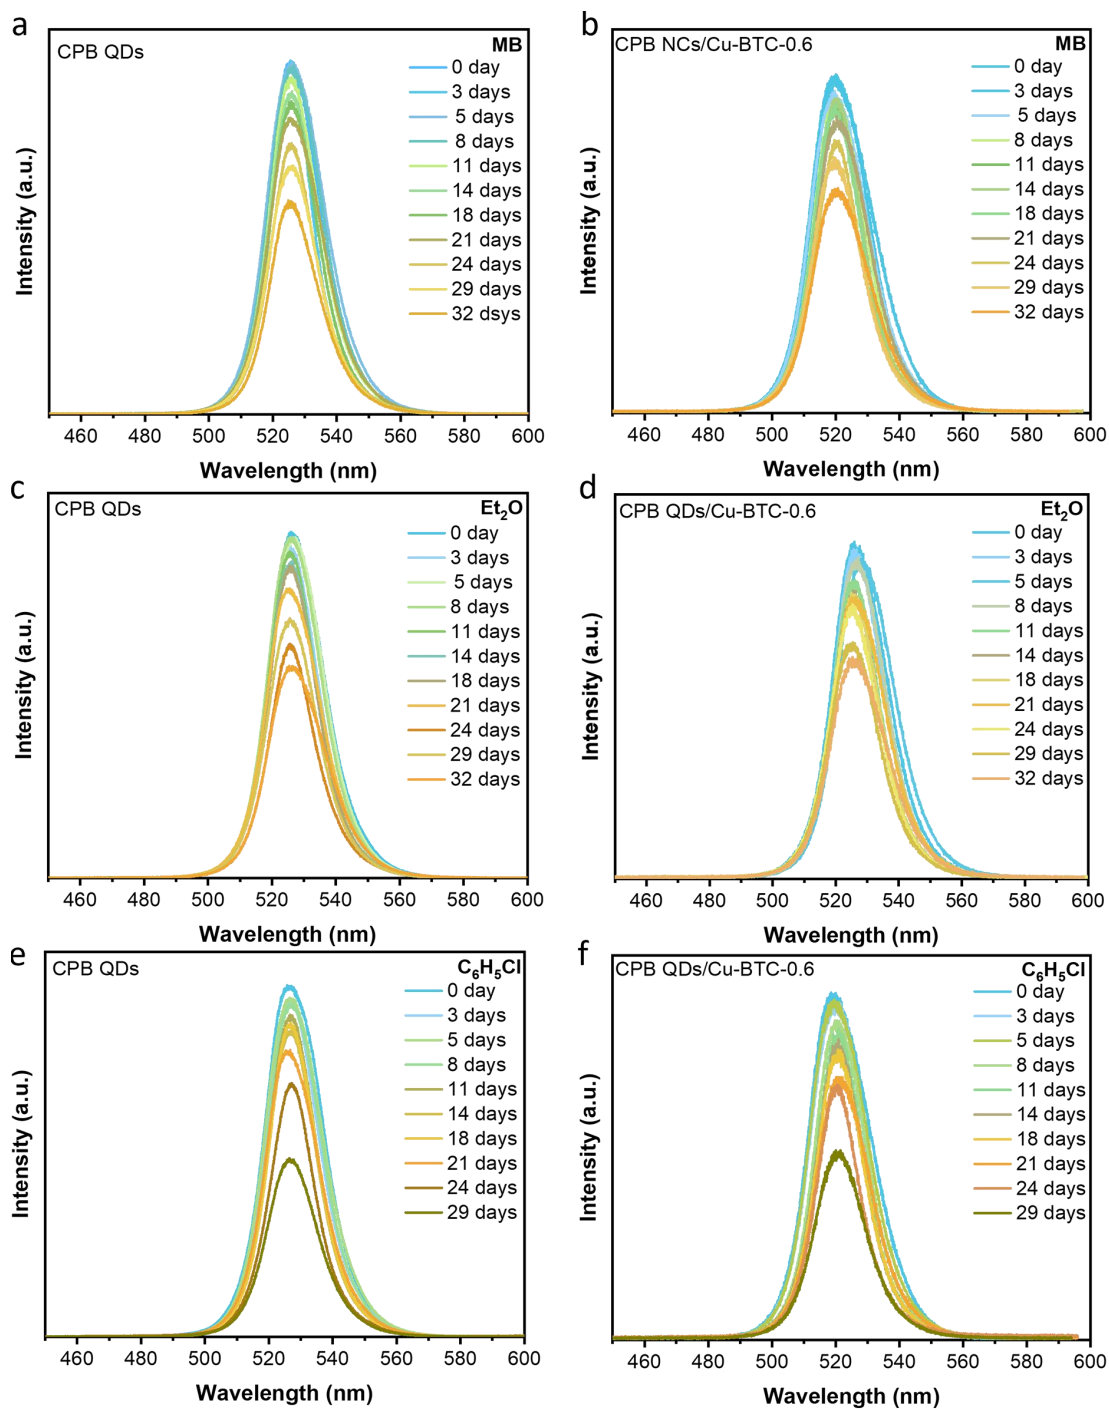

**Fig. S11.** PL spectra of pure CPB QDs and CPB QDs/Cu-BTC-0.6 composites in methylbenzene (MB) (a-b), ethyl alcohol (Et<sub>2</sub>O) (c-d) and chlorobenzene (C<sub>6</sub>H<sub>5</sub>Cl) (e-f).

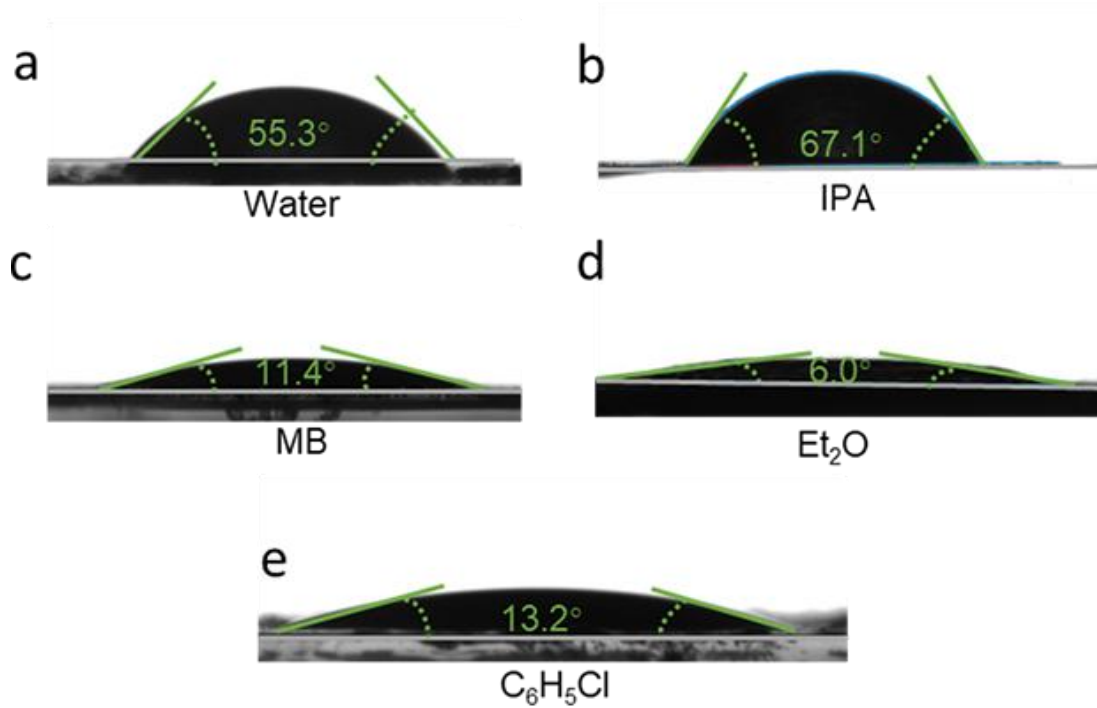

**Fig. S12.** The images of contact angle between Cu-BTC film and water (a), IPA (b), MB (c), Et<sub>2</sub>O (d), C<sub>6</sub>H<sub>5</sub>Cl (e).



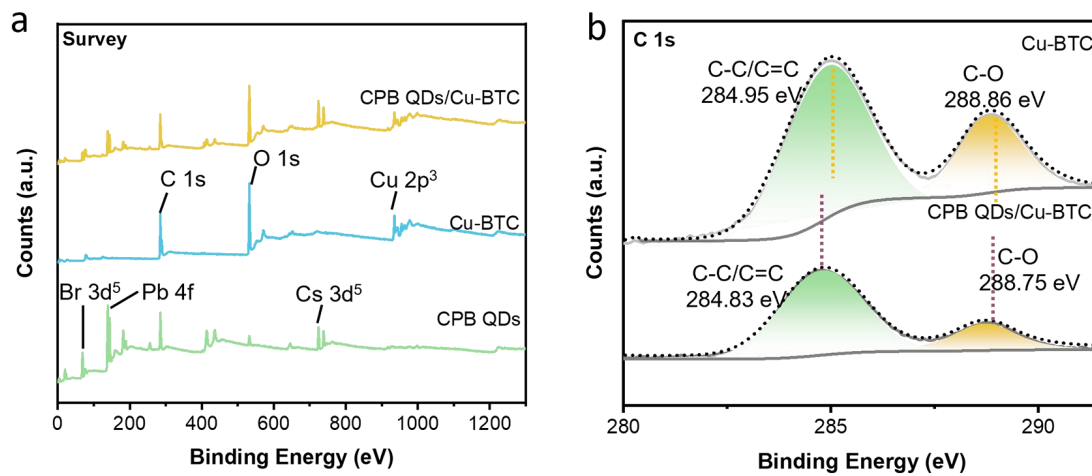

**Fig. S13.** XPS characterizations of pristine CPB QDs, Cu-BTC, and CPB QDs/Cu-BTC composites. (a) The survey XPS spectra. (b) High-resolution XPS spectra of C 1s.

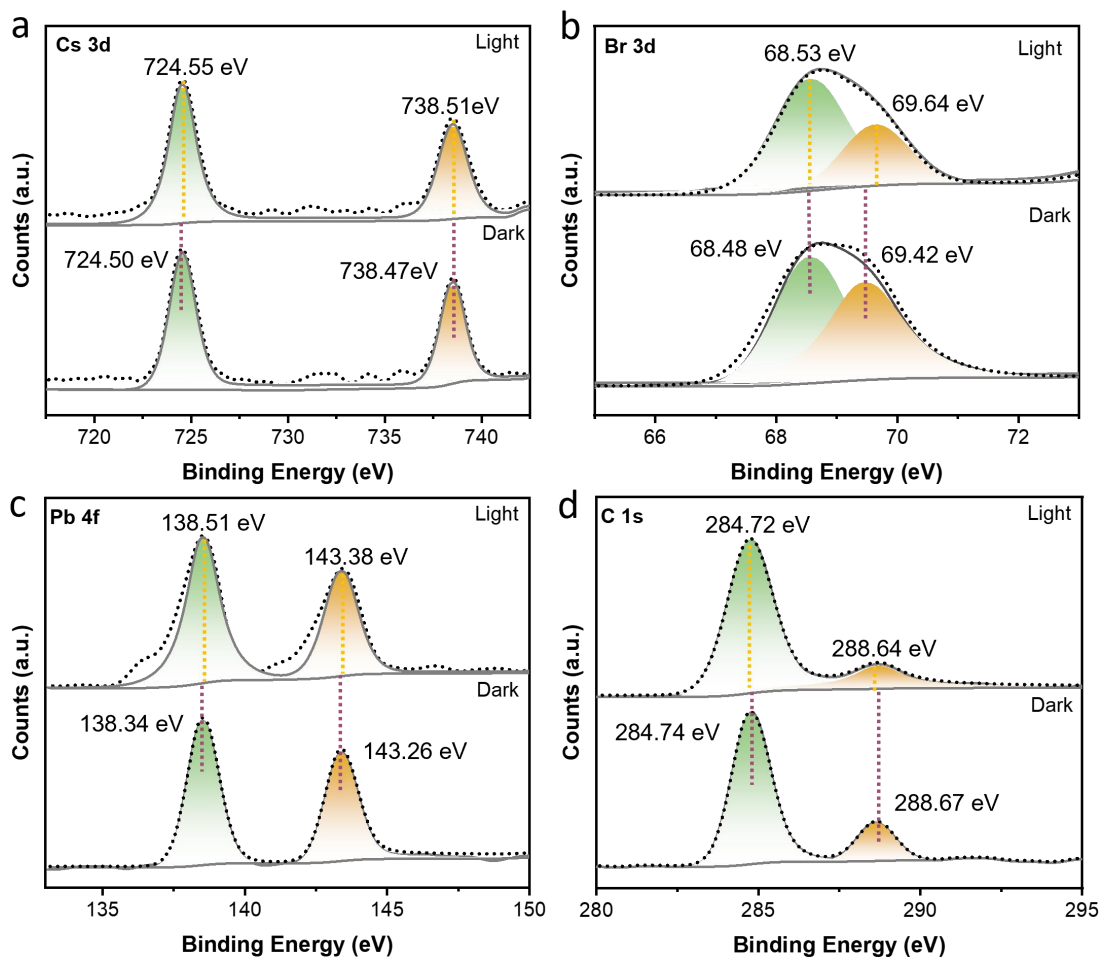

**Fig. S14.** In-situ XPS characterizations of CPB QDs/Cu-BTC composite in the dark or under visible light irradiation (a-d).

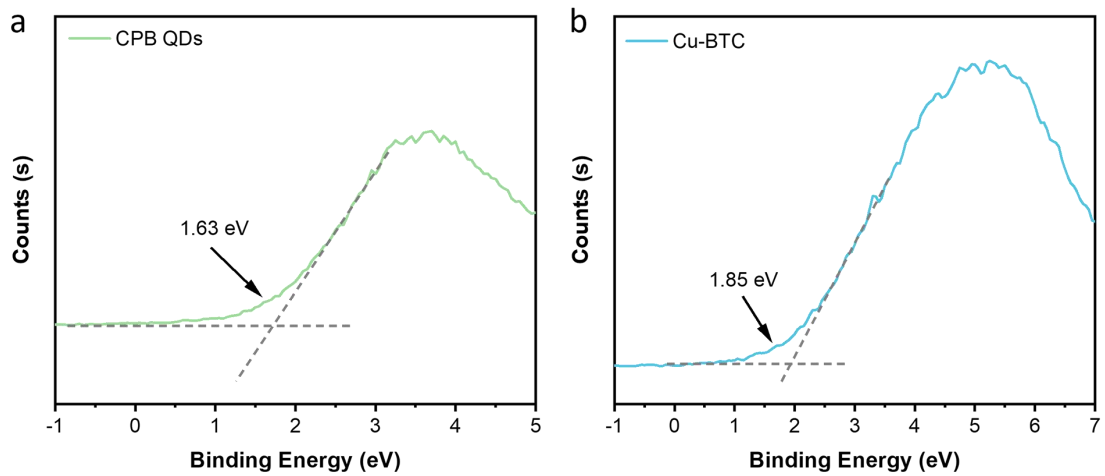

**Fig. S15.** Valence band spectra of CPB QDs (a) and Cu-BTC (b).

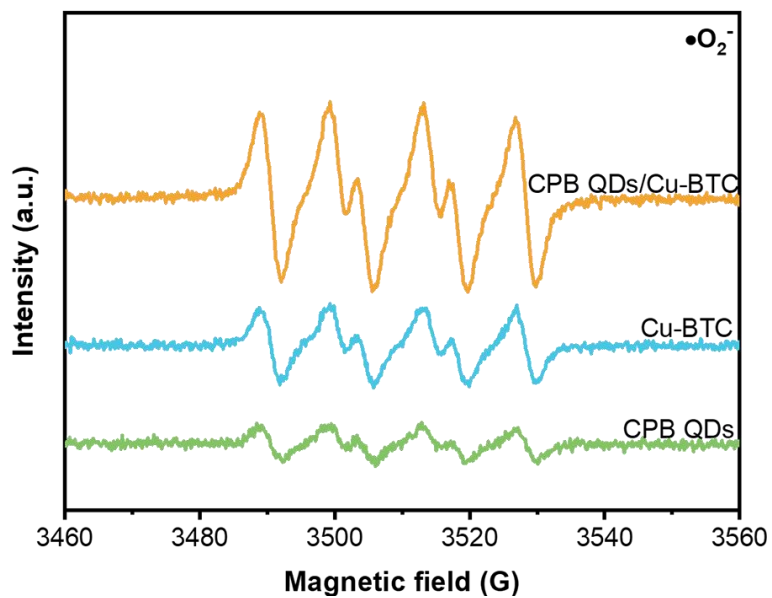

**Fig. S16.** ESR spectra of  $\bullet\text{O}_2^-$  trapped by DMPO in the presence of catalysts under visible-light illumination.

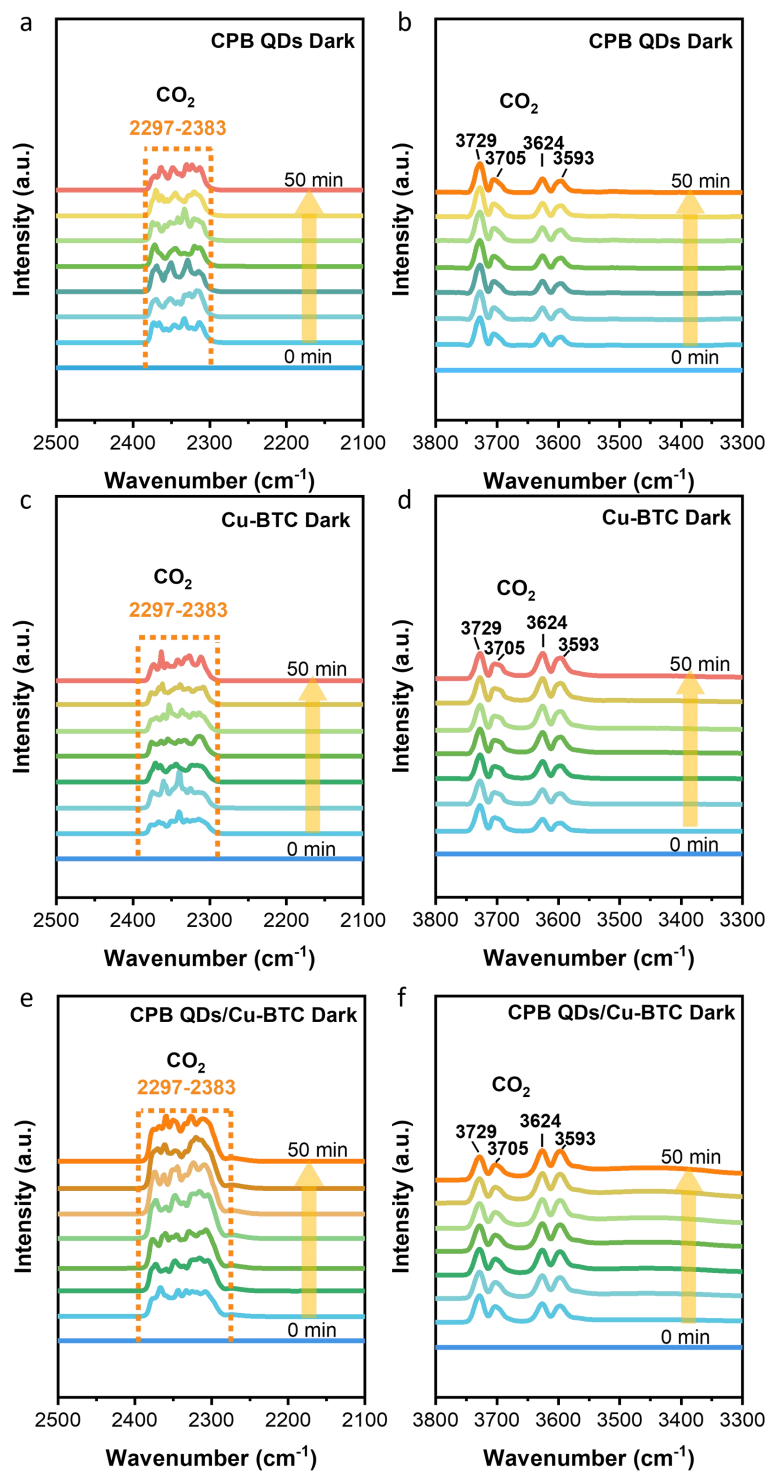

**Fig. S17.** In-situ DRIFTS spectra for photocatalytic CO<sub>2</sub> reduction over CPB QDs (a-b), Cu-BTC (c-d), and CPB QDs/Cu-BTC (e-f) photocatalysts under dark.

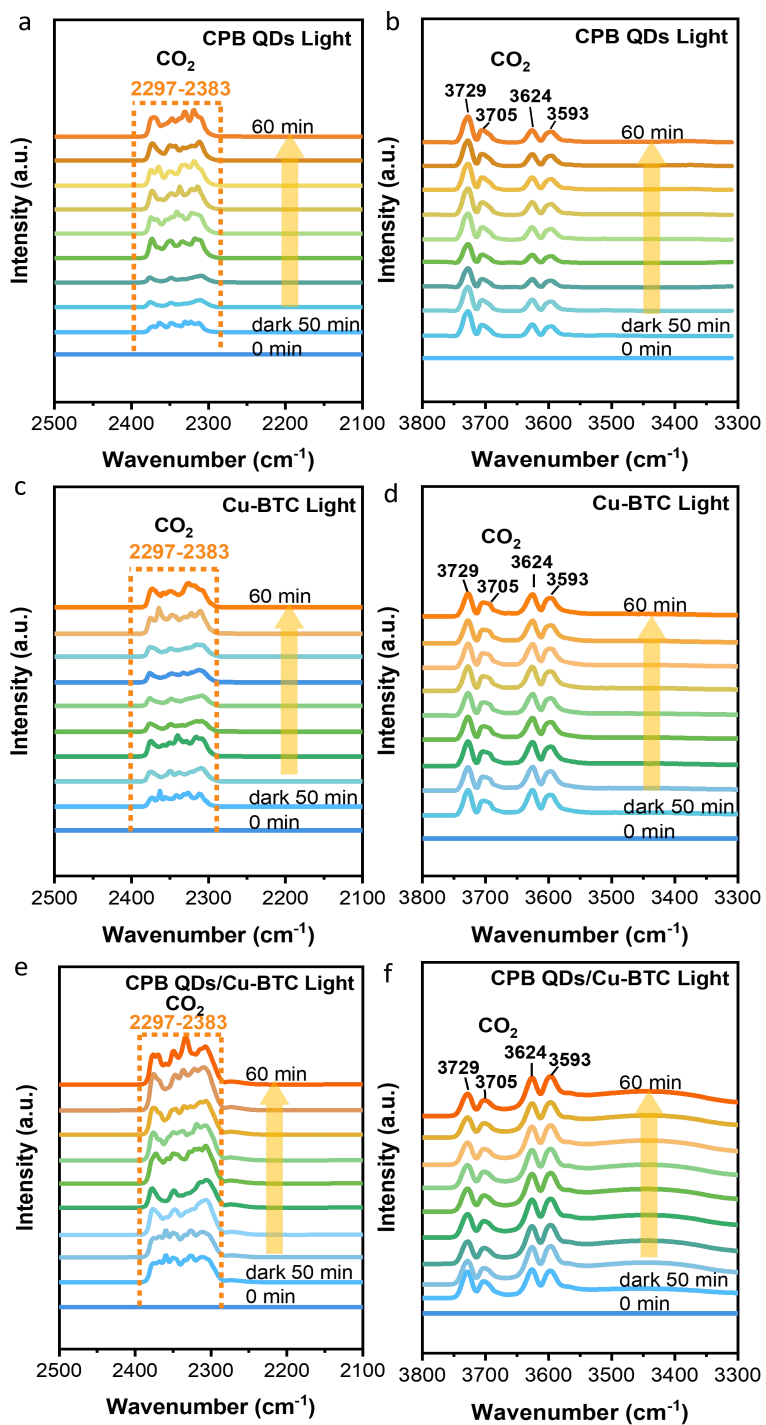

**Fig. S18.** In-situ DRIFTS spectra for photocatalytic CO<sub>2</sub> reduction over CPB QDs (a-b), Cu-BTC (c-d), and CPB QDs/Cu-BTC (e-f) photocatalysts under simulated solar illumination.

**Table S1.** Fitting parameters of the TRPL decay traces of CPB QDs and CPB QDs/Cu-BTC-0.6 samples probed at 325 nm.

| Sample             | $\tau_1(\mu)$ | $A_1$   | $A_1(\%)$ | $\tau_2(\mu s)$ | $A_2$   | $A_2(\%)$ | $\tau_{av}(\mu)$ |
|--------------------|---------------|---------|-----------|-----------------|---------|-----------|------------------|
| CPB QDs            | 5.31          | 661.856 | 16.02     | 14.58           | 1118.09 | 83.98     | 13.09            |
| CPB QDs/Cu-BTC-0.6 | 1.44          | 44.19   | 44.49     | 8.42            | 137.30  | 55.51     | 5.31             |

The two-exponential decay curves were fitted using a non-linear least-squares method with a two-component decay law. The average lifetime ( $\tau_{av}$ ) was then determined using the equation:

$$\tau_{av} = (A_1 \tau_1^2 + A_2 \tau_2^2) / (A_1 \tau_1 + A_2 \tau_2)$$

**Table S2.** Summarize the performance of various visible light-driven photocatalytic CO<sub>2</sub> reduction. EA: ethyl acetate; IPA: isopropanol; ACN: acetonitrile; BA: benzyl alcohol; TEOA: Triethanolamine.

| Photocatalysts                                                           | Light source                                                                 | Reaction medium              | Yield ( $\mu\text{mol g}^{-1} \text{h}^{-1}$ ) | Stability    | Ref.      |
|--------------------------------------------------------------------------|------------------------------------------------------------------------------|------------------------------|------------------------------------------------|--------------|-----------|
| CPB QDs/Cu-BTC                                                           | a Xe lamp<br>( $\lambda > 420 \text{ nm}$ , $200 \text{ mW cm}^{-2}$ )       | EA/H <sub>2</sub> O          | CO (47.82)                                     | ten cycles   | this work |
| g-C <sub>3</sub> N <sub>4</sub> @Cs <sub>2</sub> AgBiBr <sub>6</sub>     | a Xe lamp<br>( $\lambda > 420 \text{ nm}$ , $80 \text{ mW cm}^{-2}$ )        | TEOA/<br>EA/H <sub>2</sub> O | CO (10.30)<br>CH <sub>4</sub> (0.88)           | three cycles | 3         |
| CsPbBr <sub>3</sub> QD/GO                                                | 100 W Xe lamp                                                                | H <sub>2</sub> O             | CO (23.7)                                      | 12 h         | 4         |
| CsPbBr <sub>3</sub> @ZIF-8                                               | a 100 W Xe lamp<br>( $\lambda > 420 \text{ nm}$ , $150 \text{ mW cm}^{-2}$ ) | EA                           | CO (29.630)                                    | six cycles   | 5         |
| Co <sub>2</sub> %@CsPbBr <sub>3</sub> /Cs <sub>4</sub> PbBr <sub>6</sub> | 300 W Xe lamp<br>( $\lambda > 400 \text{ nm}$ , $100 \text{ mW/cm}^2$ )      | H <sub>2</sub> O             | CO (11.95)                                     | 20 h         | 6         |
| CsPbBr <sub>3</sub> /Pd                                                  | 150 W Xe lamp<br>( $\lambda > 400 \text{ nm}$ )                              | H <sub>2</sub> O             | CO (33.09)                                     | three cycles | 7         |
| CsPbBr <sub>3</sub> QDs/UiO-66(NH <sub>2</sub> )                         | 300 W Xe lamp<br>( $\lambda > 420 \text{ nm}$ )                              | EA/ H <sub>2</sub> O         | CO (8.21)<br>CH <sub>4</sub> (0.26)            | three cycles | 8         |
| CsPbI <sub>x</sub> Br <sub>3-x</sub> PQDs/PES                            | 300 W Xe lamp<br>(AM 1.5G)                                                   | H <sub>2</sub> O             | CO (32.45)                                     | 2 h          | 9         |
| CsPbBr <sub>3</sub> /PCN                                                 | 300 W Xe lamp                                                                | ACN/ H <sub>2</sub> O        | CO (148.9)                                     | three        | 10        |



|                                                                                   |                                           |                  |            |                 |    |
|-----------------------------------------------------------------------------------|-------------------------------------------|------------------|------------|-----------------|----|
|                                                                                   | ( $\lambda > 420$ nm)                     |                  |            | cycles          |    |
| In <sub>4</sub> SnS <sub>8</sub> /Cs <sub>3</sub> Bi <sub>2</sub> Br <sub>9</sub> | 300 W argon lamp<br>( $\lambda > 420$ nm) | H <sub>2</sub> O | CO (9.55)  | three<br>cycles | 11 |
| MCM41@<br>50wt% CBB                                                               | 300 W Xe lamp<br>( $\lambda > 420$ nm)    | H <sub>2</sub> O | CO (17.27) | eight<br>cycles | 12 |

---

## References

- 1 L. Ren, Y. Wang, M. Wang, S. Wang, Y. Zhao, C. Cazorla, C. Chen, T. Wu and K. Jin, *J. Phys. Chem. Lett.*, 2020, **11**, 2577–2584.
- 2 Y. Zhang, W. Chen, M. Zhou, G. Miao and Y. Liu, *ACS Appl. Energy Mater.*, 2021, **4**, 9154–9165.
- 3 W. Xiong, Y. Dong and A. Pan, *Nanoscale*, 2023, **15**, 15619.
- 4 Y.-F. Xu, M.-Z. Yang, B.-X. Chen, X.-D. Wang, H.-Y. Chen, D.-B. Kuang and C.-Y. Su, *J. Am. Chem. Soc.*, 2018, **1**, 5083–5089.
- 5 Z.-C. Kong, J.-F. Liao, Y.-J. Dong, Y.-F. Xu, H.-Y. Chen, D.-B. Kuang and C.-Y. Su, *ACS Energy Letters.*, 2018, **3**, 2656–2662.
- 6 Y.-F. Mu, W. Zhang, X.-X. Guo, G.-X. Dong, M. Zhang and T.-B. Lu, *ChemSusChem*, 2019, 4769–477.
- 7 Y.-F. Xu, M.-Z. Yang, H.-Y. Chen, J.-F. Liao, X.-D. Wang and D.-B. Kuang, *ACS Appl. Energy Mater.*, 2018, **1**, 5083–5089.
- 8 S. Wan, M. Ou, Q. Zhong and X. Wang, *Chem. Eng. J.*, 2019, **358**, 1287–1295.
- 9 Y. Jiang, J.-F. Liao, H.-Y. Chen, H.-H. Zhang, J.-Y. Li, X.-D. Wang and D.-B. Kuang, *Chem*, 2020, **6**, 766–780.

- 10 M. Ou, W. Tu, S. Yin, W. Xing, S. Wu, H. Wang, S. Wan, Q. Zhong and R. Xu, *Angew. Chem. Int. Ed.*, 2018, **57**, 13570–13574.
- 11 Z. Zhang, M. Wang, Z. Chi, W. Li, H. Yu, N. Yang and H. Yu, *Appl. Catal B: Environ*, 2022, **313**, 121426.
- 12 Z. Cui, P. Wang, Y. Wu, X. Liu, G. Chen, P. Gao, Q. Zhang, Z. Wang, Z. Zheng, H. Cheng, Y. Liu, Y. Dai and B. Huang, *Appl. Catal B: Environ*, 2022, **310**, 121375.
